# Supplementary material for: Phenotypic subgrouping and multi-omics analyses reveal reduced diazepam-binding inhibitor (DBI) protein levels in autism spectrum disorder with severe language impairment
Source: PubMed Central journal article supplement (PMC6438570; doi:10.1371/journal.pone.0214198), 2019-03-28

# Blue vs Control

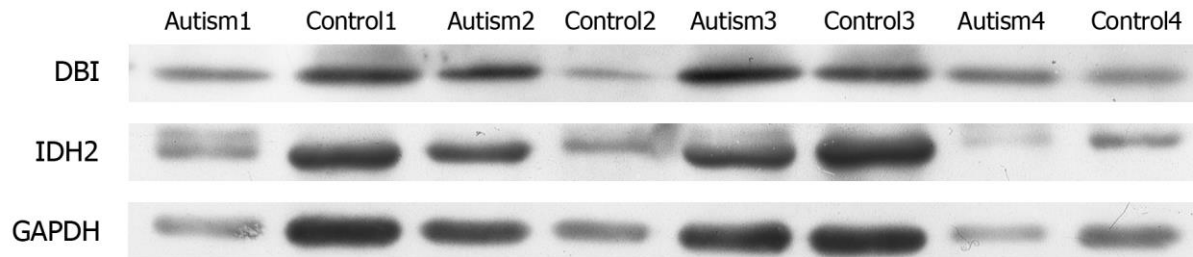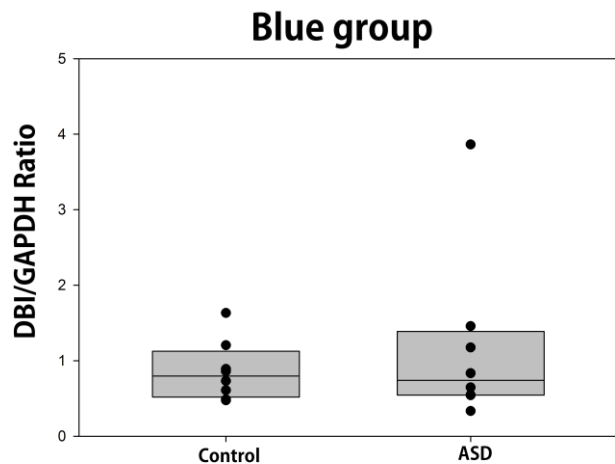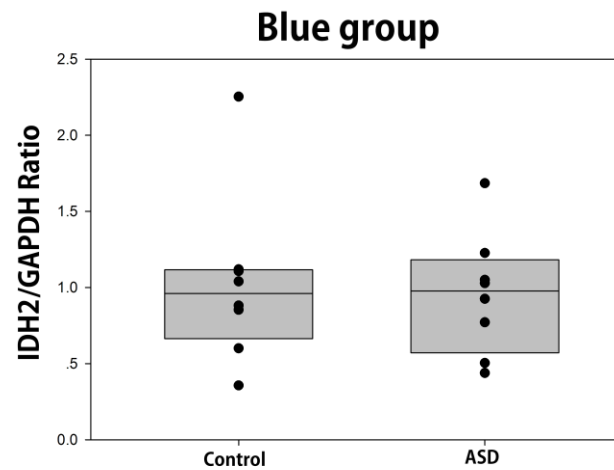

# Green vs Control

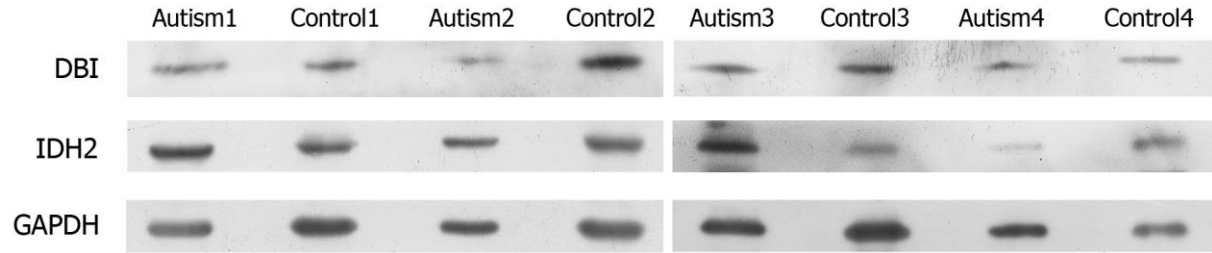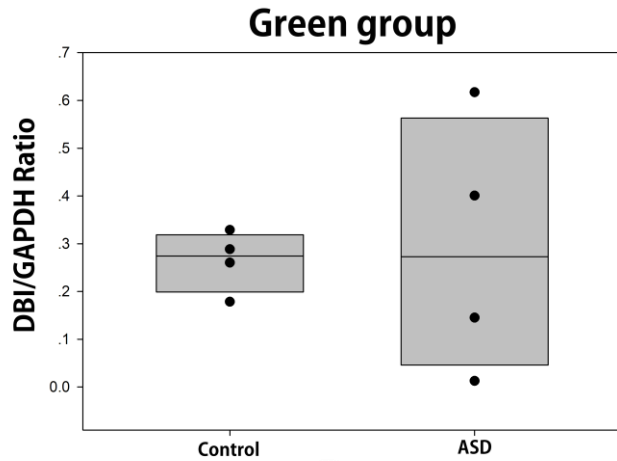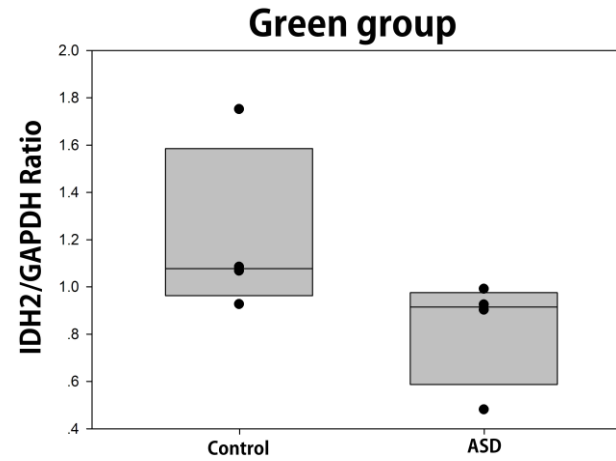

# Yellow vs Control

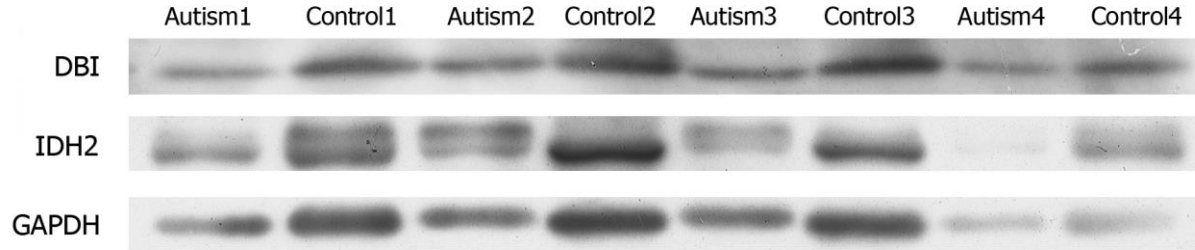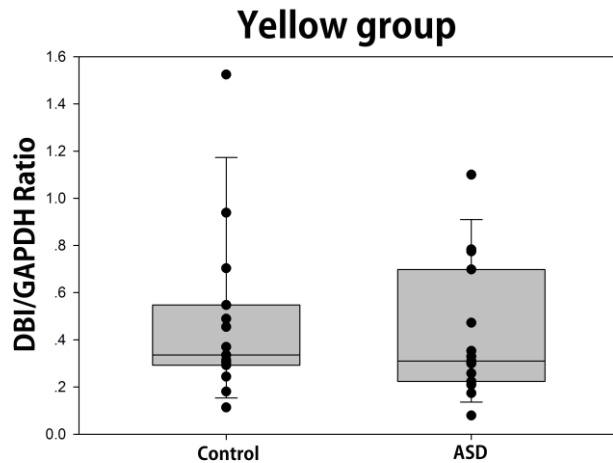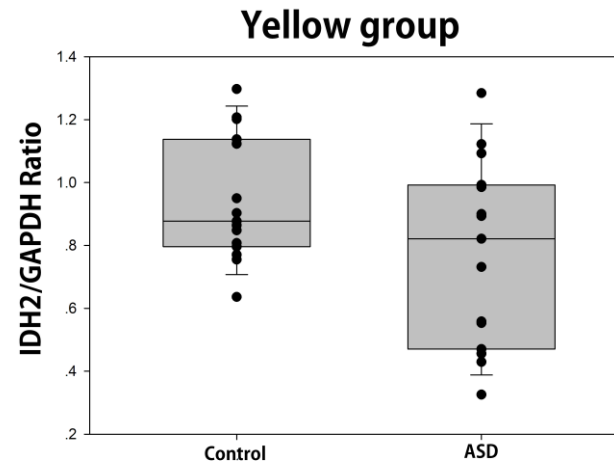

Supplement: pone.0214198.s008.pdf [file pone.0214198.s008.pdf]
